# Supplementary material
Source: HighWire-hosted journal article supplement (https://msystems.asm.org/content/3/5/e00167-18)

**Figure S1.**

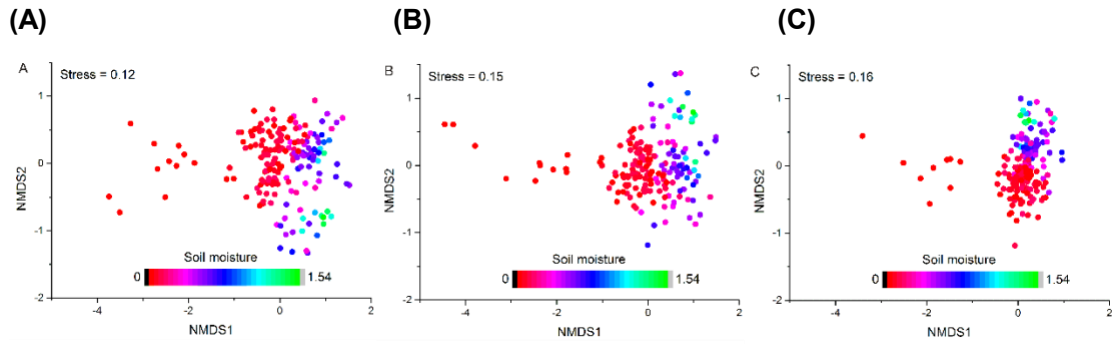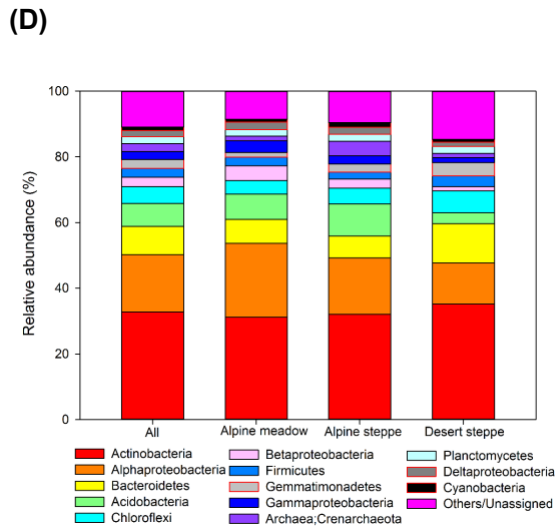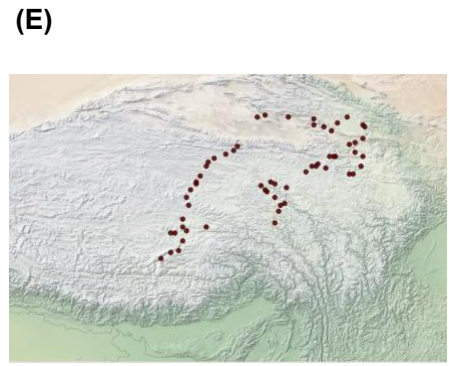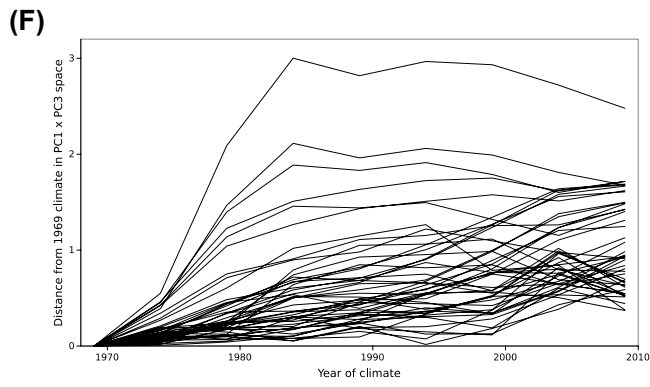

Supplement: inline-supplementary-material-1 [file inline-supplementary-material-1.pdf]
